# Supplementary material for: Geodetic measurements reveal similarities between post–Last Glacial Maximum and present-day mass loss from the Greenland ice sheet
Source: PubMed Central journal article supplement — Sci Adv. 2016 Sep 21;2(9):e1600931. doi: 10.1126/sciadv.1600931 (PMC5031466; doi:10.1126/sciadv.1600931), 2016-09-21
Supplement: 1600931_SM.pdf [file 1600931_SM.pdf]

## Supplementary Materials for

### **Geodetic measurements reveal similarities between post–Last Glacial Maximum and present-day mass loss from the Greenland ice sheet**

Shfaqat A. Khan, Ingo Sasgen, Michael Bevis, Tonie van Dam, Jonathan L. Bamber, John Wahr, Michael Willis, Kurt H. Kjær, Bert Wouters, Veit Helm, Beata Csatho, Kevin Fleming, Anders A. Bjørk, Andy Aschwanden, Per Knudsen, Peter Kuipers Munneke

Published 21 September 2016, *Sci. Adv.* **2**, e1600931 (2016)

DOI: 10.1126/sciadv.1600931

#### **This PDF file includes:**

- fig. S1. Locations of the permanent GPS stations in Greenland.
- fig. S2. Monthly mean values of vertical GPS solutions after removing the annual, semiannual, and elastic vertical displacement.
- fig. S3. Elevation change rate during 1997–2015.
- fig. S4. Time series of GrIS mass loss rate.
- fig. S5. Ice thickness change since the LGM as represented by the Green1 VM-GPS.
- fig. S6. GIA rates.
- fig. S7. Landsat image of southeast Greenland.
- table S1. Location of GPS sites, data time span, observed uplift rates, predicted elastic uplift rates, and observed GIA uplift rate.
- table S2. 1D viscosity profiles for Greenland.
- table S3. 1D viscosity profiles assigned to each region in Greenland.
- table S4. Uncertainty of the scaling parameter caused by the load and Earth model parameters.
- table S5. Ratio of inferred scaling factor for the 3D viscosity profiles versus the 1D viscosity profile (VM-GPS).
- table S6. SLE mass change per basin since LGM.
- table S7. SLE mass change per basin during 1900–1983.

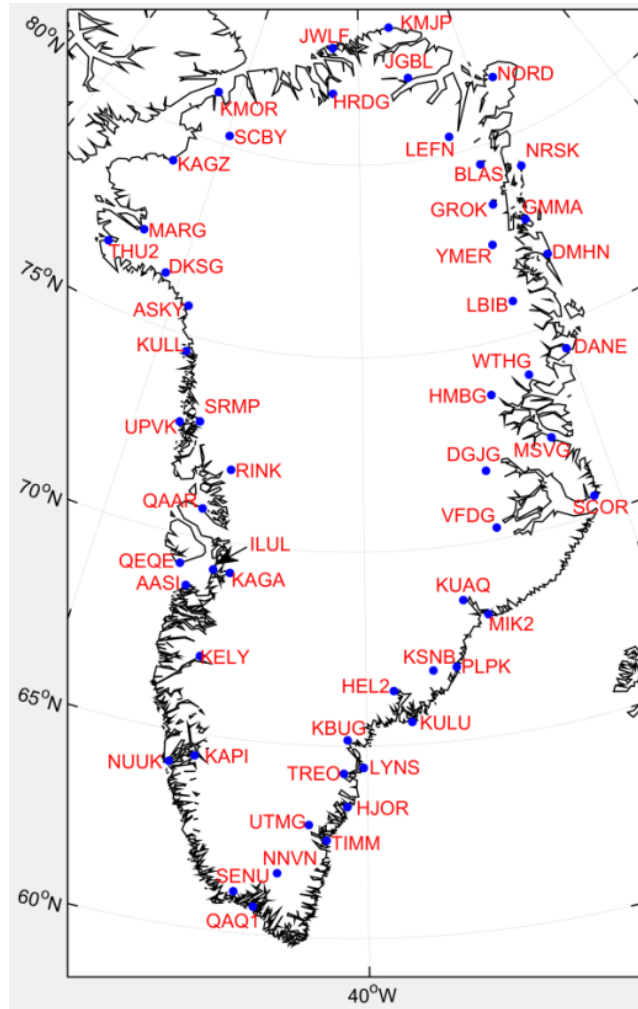

fig. S1. Locations of the permanent GPS stations in Greenland.

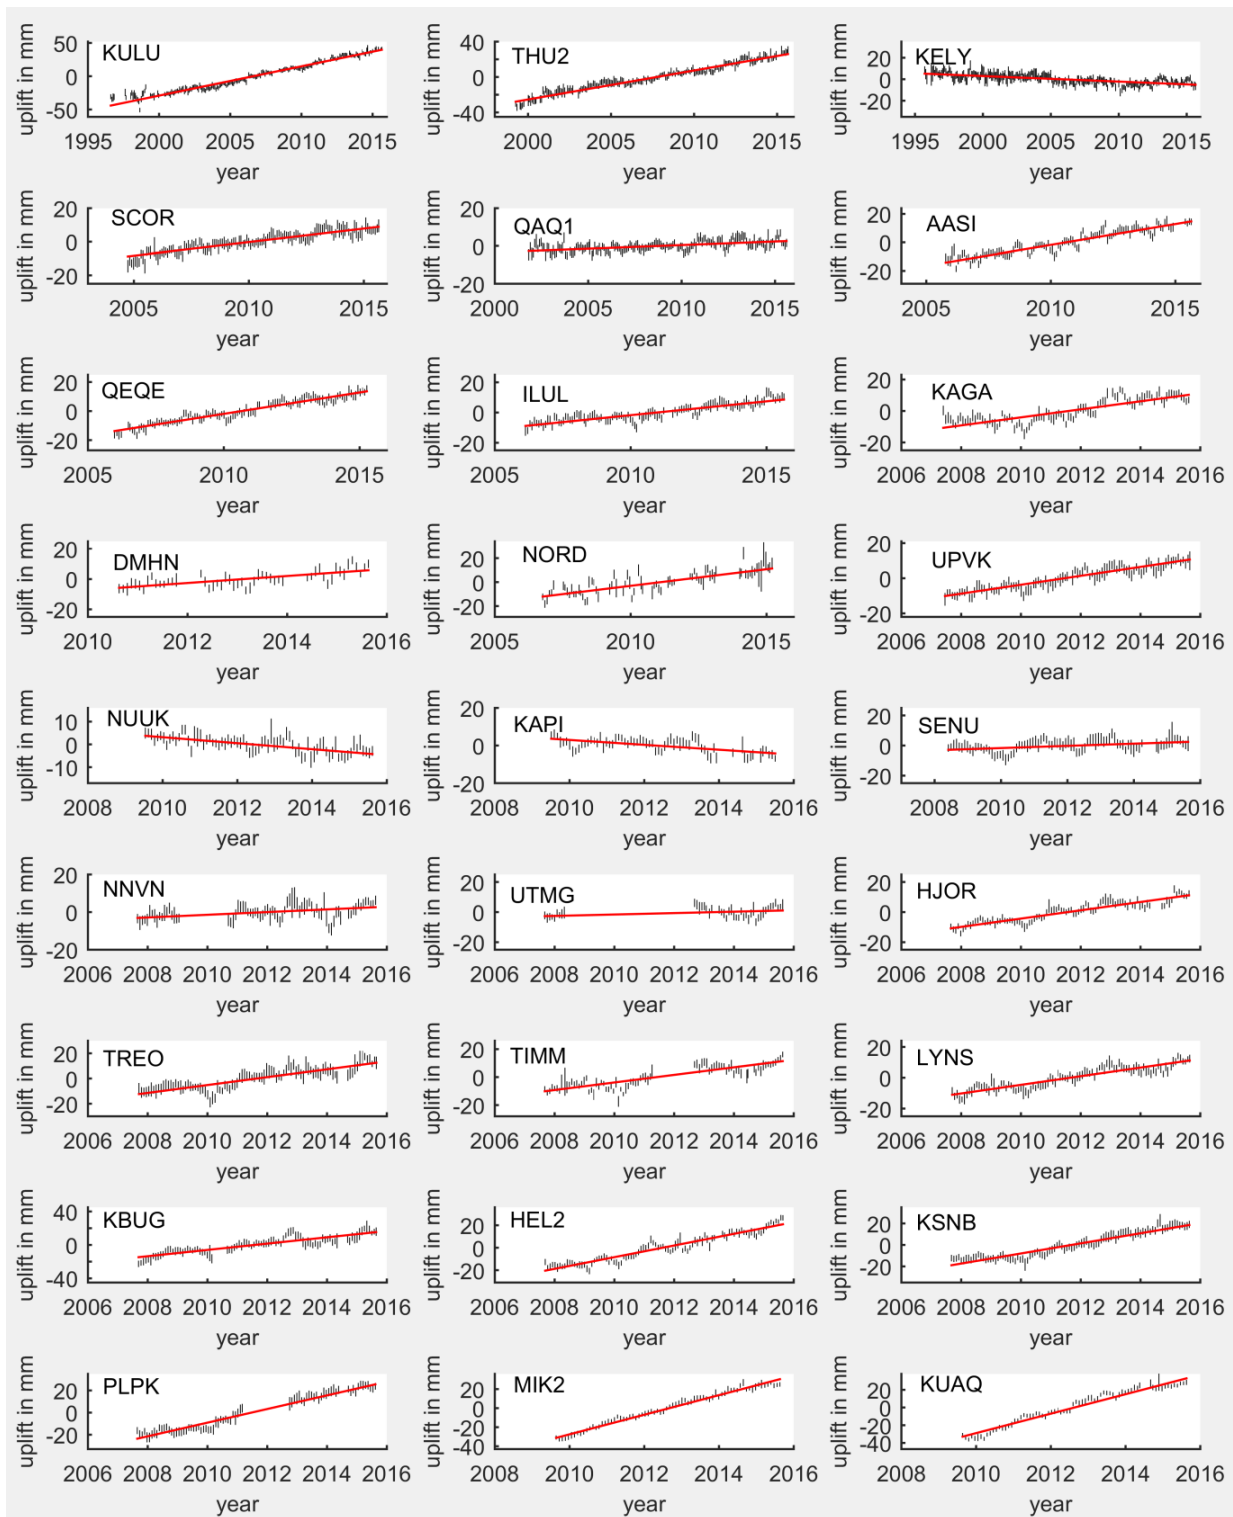

**fig. S2. Monthly mean values of vertical GPS solutions after removing the annual, semiannual, and elastic vertical displacement. The red line represents the best fitting linear term.**

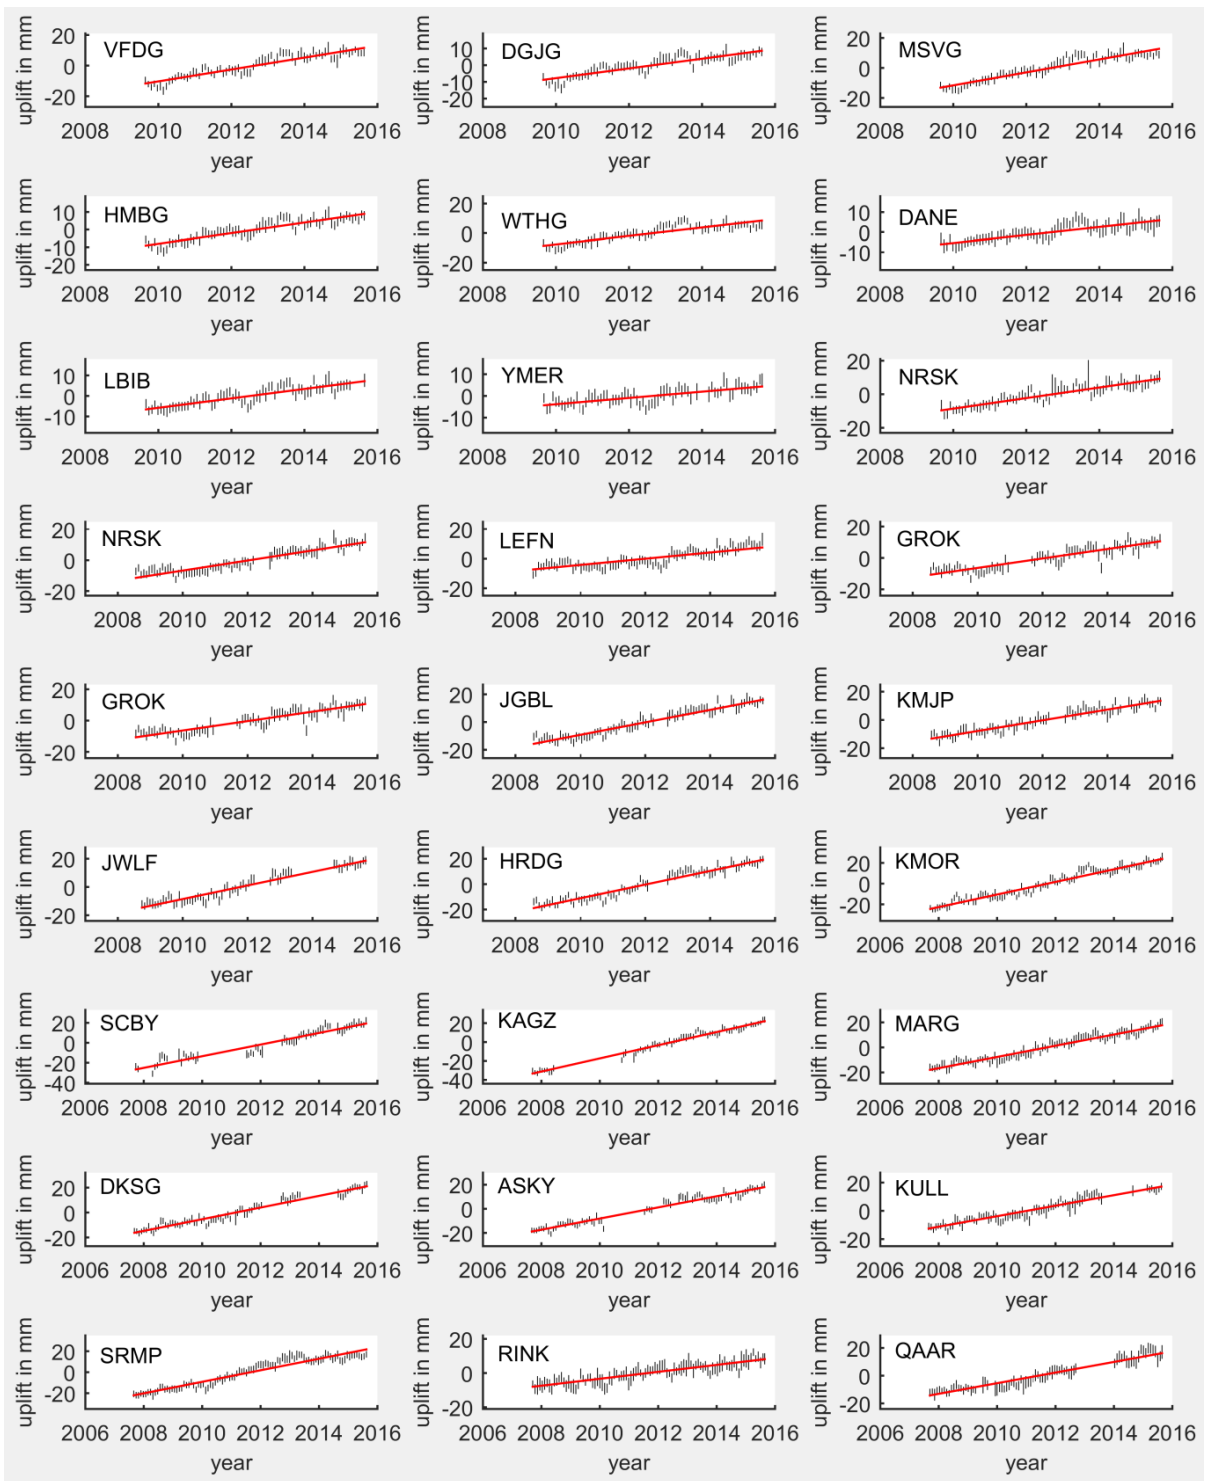

**fig. S2 (continued).** Monthly mean values of vertical GPS solutions after removing the annual, semiannual, and elastic vertical displacement. The red curve represents the best fitting linear term.

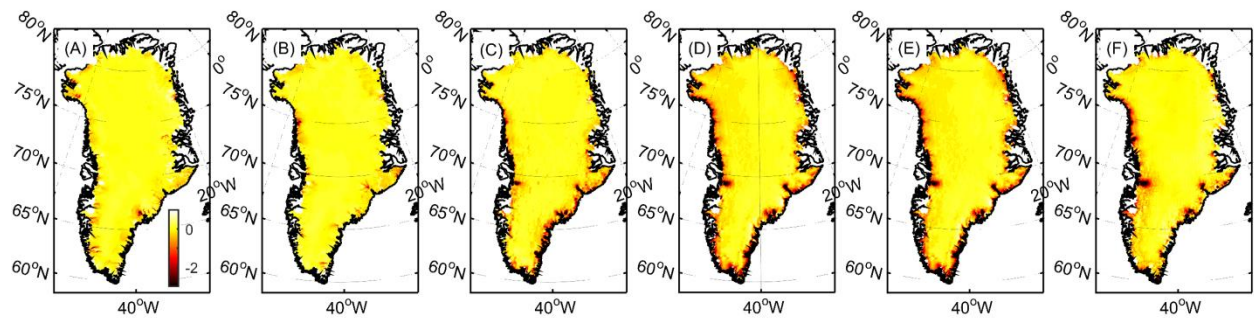

**fig. S3. Elevation change rate during 1997–2015. (A) 1997–2000, (B) 2000–2003, (C) 2003–2006, (D) 2006–2009, (E) 2009–2012, and (F) 2012–2015.**

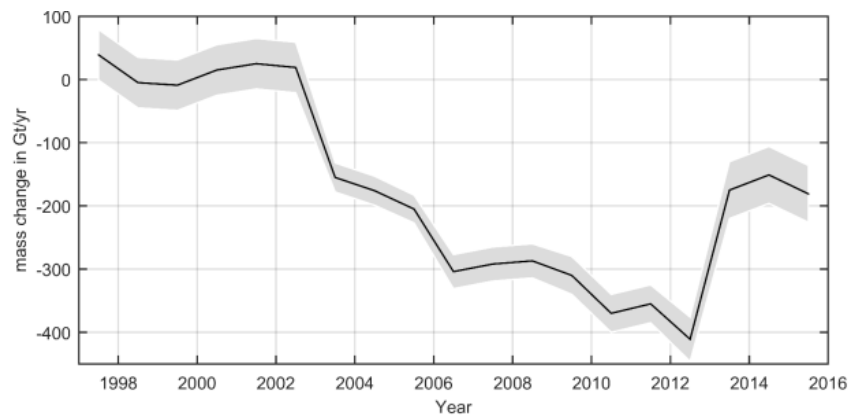

**fig. S4. Time series of GrIS mass loss rate.**

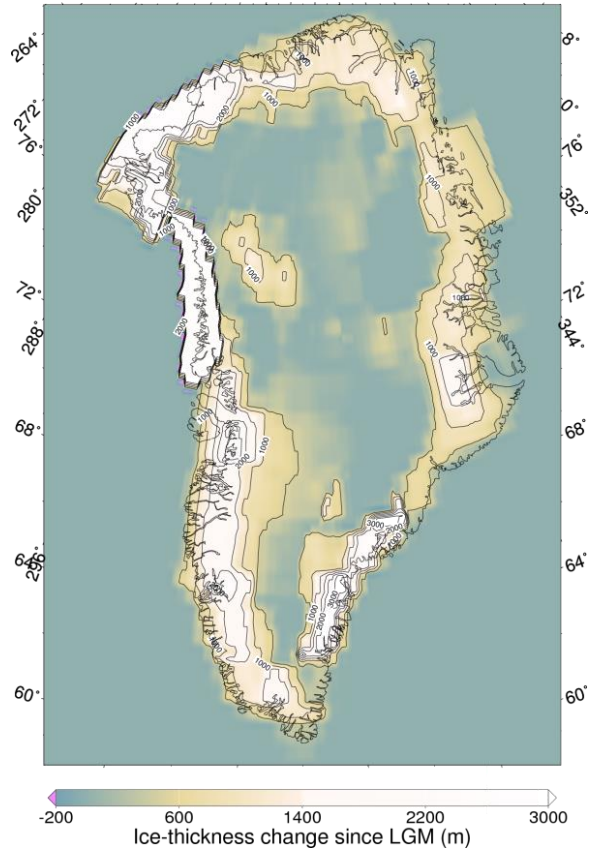

**fig. S5. Ice thickness change since the LGM as represented by the Green1 VM-GPS.**

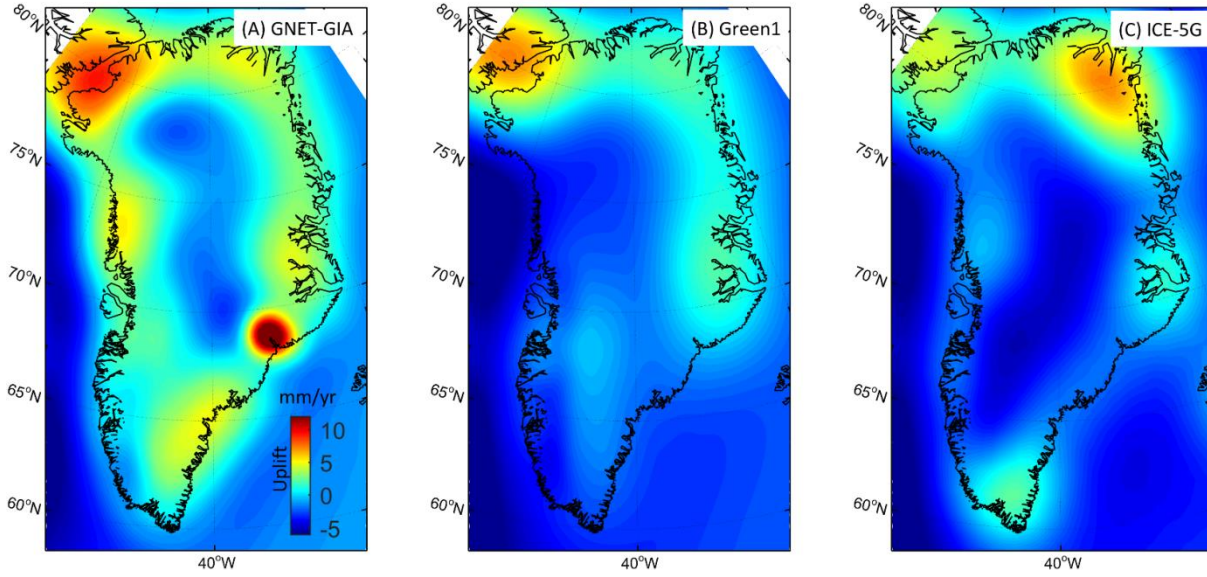

**fig. S6. GIA rates.** (A) GIA vertical displacement rates from new model “GNET-GIA”, (B) Green1 GIA rates. (C) ICE-5G GIA rates.



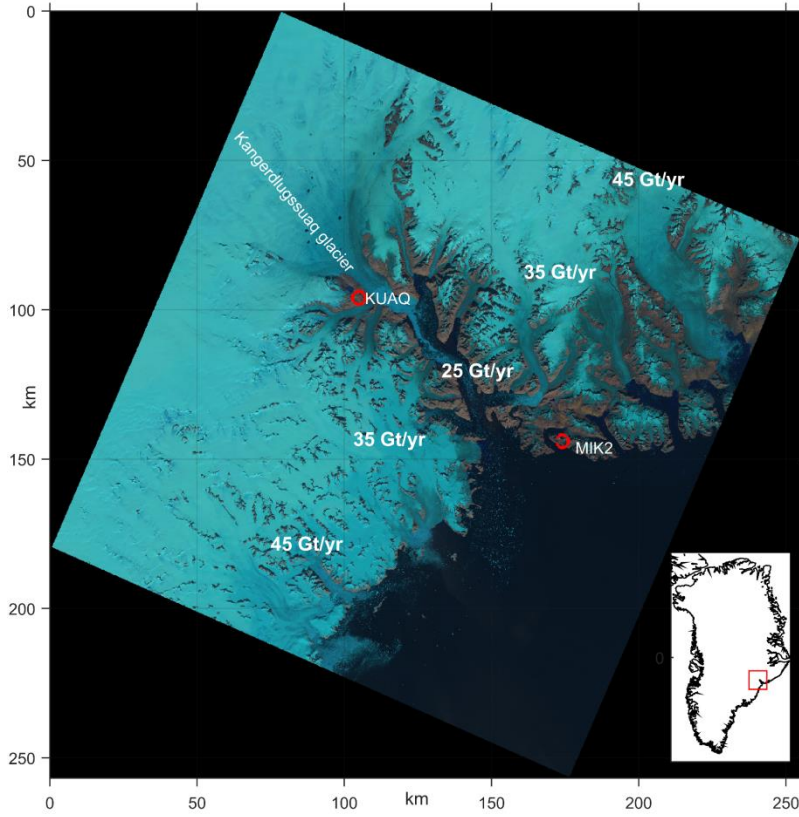

**fig. S7. Landsat image of southeast Greenland.** The red circles denote the locations of GPS sites MIK2 and KUAQ. The numbers in Gt/yr denote the locations of areas of potential mass loss required to explain the observed uplift at KUAQ and MIK2 as an elastic signal.



**table S1. Location of GPS sites, data time span, observed uplift rates, predicted elastic uplift rates, and observed GIA uplift rate.**

| Site | Latitude   | Longitude  | t_start | t_end  | Up rate    | Elastic Up rate | GIA Up rate | Basin # |
|------|------------|------------|---------|--------|------------|-----------------|-------------|---------|
|      | Deg        | deg        | Year    | Year   | mm/yr      | mm/yr           | mm/yr       |         |
| BLAS | 79.53861 N | 22.97472 W | 2008.5  | 2015.6 | 7.6 ± 0.2  | 4.3 ± 0.5       | 3.3 ± 0.5   | 1       |
| LEFN | 80.45668 N | 26.29346 W | 2008.5  | 2015.6 | 6.3 ± 0.2  | 4.3 ± 0.2       | 2.1 ± 0.3   | 1       |
| JGBL | 82.20876 N | 31.00420 W | 2008.5  | 2015.6 | 6.0 ± 0.2  | 1.5 ± 0.2       | 4.5 ± 0.3   | 1       |
| KMJP | 83.64324 N | 33.37708 W | 2008.5  | 2015.6 | 4.7 ± 0.2  | 0.9 ± 0.1       | 3.8 ± 0.2   | 1       |
| JWLF | 83.11165 N | 45.11983 W | 2008.5  | 2015.6 | 5.9 ± 0.2  | 1.1 ± 0.2       | 4.8 ± 0.3   | 1       |
| HRDG | 81.87983 N | 44.51737 W | 2008.5  | 2015.6 | 7.5 ± 0.2  | 2.1 ± 0.2       | 5.4 ± 0.3   | 1       |
| KMOR | 81.25271 N | 63.52739 W | 2007.7  | 2015.6 | 8.0 ± 0.1  | 1.9 ± 0.1       | 6.1 ± 0.1   | 1       |
| SCBY | 80.26013 N | 59.59362 W | 2007.7  | 2015.6 | 8.0 ± 0.2  | 2.2 ± 0.3       | 5.8 ± 0.4   | 1       |
| KAGZ | 79.13196 N | 65.85295 W | 2007.7  | 2015.6 | 10.4 ± 0.1 | 3.4 ± 0.3       | 7.0 ± 0.3   | 1       |
| NORD | 81.60014 N | 16.65545 W | 2006.7  | 2015.2 | 4.0 ± 0.3  | 1.3 ± 0.2       | 2.8 ± 0.4   | 1       |
| DMHN | 76.77107 N | 18.65568 W | 2010.6  | 2015.6 | 3.4 ± 0.3  | 1.2 ± 0.2       | 2.3 ± 0.4   | 2       |
| LBIB | 75.89380 N | 23.85294 W | 2009.6  | 2015.6 | 4.0 ± 0.2  | 1.7 ± 0.4       | 2.3 ± 0.4   | 2       |
| YMER | 77.43289 N | 24.32633 W | 2009.6  | 2015.6 | 3.3 ± 0.2  | 1.8 ± 0.5       | 1.5 ± 0.5   | 2       |
| GMMA | 77.80943 N | 19.65212 W | 2009.6  | 2015.6 | 5.3 ± 0.2  | 2.1 ± 0.1       | 3.2 ± 0.2   | 2       |
| NRSK | 79.15503 N | 17.72542 W | 2008.5  | 2015.6 | 6.2 ± 0.2  | 2.2 ± 0.1       | 4.0 ± 0.2   | 2       |
| GROK | 78.44270 N | 22.90376 W | 2008.5  | 2015.6 | 7.9 ± 0.2  | 4.9 ± 0.5       | 3.0 ± 0.5   | 2       |
| SCOR | 70.48534 N | 21.95032 W | 2004.7  | 2015.6 | 3.8 ± 0.1  | 2.2 ± 0.1       | 1.6 ± 0.1   | 3A      |
| VFDG | 70.29992 N | 29.81764 W | 2009.6  | 2015.6 | 8.8 ± 0.2  | 4.9 ± 0.5       | 3.9 ± 0.5   | 3A      |
| DGJG | 71.78653 N | 29.85020 W | 2009.6  | 2015.6 | 7.1 ± 0.2  | 4.2 ± 0.5       | 2.9 ± 0.5   | 3A      |
| MSVG | 72.24082 N | 23.91286 W | 2009.6  | 2015.6 | 5.6 ± 0.2  | 1.3 ± 0.1       | 4.3 ± 0.2   | 3A      |
| HMBG | 73.67598 N | 28.12907 W | 2009.6  | 2015.6 | 4.1 ± 0.2  | 1.1 ± 0.5       | 3.0 ± 0.5   | 3A      |
| WTHG | 73.95520 N | 24.30892 W | 2009.6  | 2015.6 | 4.9 ± 0.2  | 2.0 ± 0.4       | 2.9 ± 0.4   | 3A      |
| DANE | 74.31195 N | 20.19983 W | 2009.6  | 2015.6 | 3.1 ± 0.2  | 1.1 ± 0.1       | 2.0 ± 0.2   | 3A      |
| MIK2 | 68.14030 N | 31.45180 W | 2009.6  | 2015.6 | 15.4 ± 0.2 | 5.1 ± 0.1       | 10.3 ± 0.2  | 3B      |
| KUAQ | 68.58700 N | 33.05270 W | 2009.6  | 2015.6 | 23.8 ± 0.3 | 11.8 ± 1.3      | 12.0 ± 1.3  | 3B      |
| KULU | 65.57933 N | 37.14935 W | 1996.6  | 2015.6 | 7.7 ± 0.1  | 3.3 ± 0.1       | 4.4 ± 0.1   | 4       |
| UTMG | 62.92721 N | 43.30641 W | 2007.6  | 2015.6 | 8.8 ± 0.7  | 8.2 ± 1.2       | 0.6 ± 1.4   | 4       |
| HJOR | 63.41821 N | 41.14787 W | 2007.6  | 2015.6 | 7.8 ± 0.1  | 5.0 ± 0.1       | 2.8 ± 0.1   | 4       |
| TREO | 64.27707 N | 41.37508 W | 2007.7  | 2015.6 | 10.2 ± 0.2 | 7.1 ± 0.5       | 3.1 ± 0.5   | 4       |
| TIMM | 62.53554 N | 42.28616 W | 2007.6  | 2015.6 | 8.2 ± 0.2  | 5.5 ± 0.1       | 2.7 ± 0.2   | 4       |
| LYNS | 64.43048 N | 40.19806 W | 2007.7  | 2015.6 | 8.7 ± 0.2  | 5.9 ± 0.1       | 2.8 ± 0.2   | 4       |
| KBUG | 65.14368 N | 41.15755 W | 2007.7  | 2015.6 | 13.5 ± 0.2 | 11.4 ± 0.8      | 2.1 ± 0.8   | 4       |
| HEL2 | 66.40116 N | 38.21570 W | 2007.6  | 2015.6 | 15.3 ± 0.1 | 10.1 ± 1.3      | 5.2 ± 1.3   | 4       |
| KSNB | 66.86328 N | 35.57632 W | 2007.6  | 2015.6 | 14.5 ± 0.1 | 9.8 ± 0.5       | 4.7 ± 0.5   | 4       |
| PLPK | 66.89773 N | 34.03347 W | 2007.6  | 2015.6 | 12.0 ± 0.1 | 5.8 ± 0.2       | 6.2 ± 0.2   | 4       |
| SENU | 61.06958 N | 47.14131 W | 2008.4  | 2015.6 | 10.7 ± 0.1 | 10.7 ± 0.6      | 0.7 ± 0.6   | 5       |
| NNVN | 61.63188 N | 44.90105 W | 2007.6  | 2015.6 | 6.8 ± 0.4  | 6.1 ± 0.1       | 0.7 ± 0.4   | 5       |
| QAQ1 | 60.71526 N | 46.04776 W | 2001.8  | 2015.6 | 4.3 ± 0.1  | 3.9 ± 0.1       | 0.4 ± 0.1   | 5       |
| KELY | 66.98742 N | 50.94483 W | 1995.7  | 2015.6 | 3.2 ± 0.1  | 3.7 ± 0.1       | -0.5 ± 0.1  | 6       |
| AASI | 68.71932 N | 52.79334 W | 2005.7  | 2015.6 | 7.9 ± 0.1  | 5.0 ± 0.1       | 2.9 ± 0.1   | 6       |
| QEQE | 69.25263 N | 53.52232 W | 2005.9  | 2015.6 | 7.9 ± 0.1  | 5.0 ± 0.1       | 2.9 ± 0.1   | 6       |
| ILUL | 69.24041 N | 51.06075 W | 2006.1  | 2015.6 | 10.3 ± 0.1 | 8.5 ± 0.2       | 1.8 ± 0.2   | 6       |
| KAGA | 69.22230 N | 49.81463 W | 2006.4  | 2015.6 | 22.1 ± 0.1 | 19.5 ± 1.1      | 2.6 ± 1.1   | 6       |
| NUUK | 64.18355 N | 51.73116 W | 2009.0  | 2015.6 | 3.3 ± 0.3  | 4.6 ± 0.1       | -1.3 ± 0.3  | 6       |
| KAPI | 64.43235 N | 50.27121 W | 2009.5  | 2015.6 | 6.8 ± 0.3  | 8.0 ± 0.5       | -1.2 ± 0.6  | 6       |
| THU2 | 76.53705 N | 68.82503 W | 1999.2  | 2015.6 | 6.4 ± 0.1  | 3.1 ± 0.1       | 3.3 ± 0.1   | 7A      |
| MARG | 77.18704 N | 65.69462 W | 2007.7  | 2015.6 | 9.2 ± 0.1  | 4.7 ± 0.5       | 4.5 ± 0.5   | 7A      |
| DKSG | 76.35162 N | 61.67767 W | 2007.6  | 2015.6 | 16.0 ± 0.1 | 11.3 ± 0.6      | 4.7 ± 0.6   | 7B      |
| ASKY | 75.72613 N | 58.25735 W | 2007.6  | 2015.6 | 15.8 ± 0.1 | 11.2 ± 0.6      | 4.6 ± 0.6   | 7B      |

|      |            |            |        |        |            |            |           |    |
|------|------------|------------|--------|--------|------------|------------|-----------|----|
| KULL | 74.58062 N | 57.22706 W | 2007.6 | 2015.6 | 10.5 ± 0.2 | 6.8 ± 0.2  | 3.7 ± 0.3 | 7B |
| SRMP | 72.91068 N | 54.39370 W | 2007.6 | 2015.6 | 17.9 ± 0.1 | 12.5 ± 1.2 | 5.4 ± 1.2 | 7B |
| RINK | 71.84850 N | 50.99396 W | 2007.7 | 2015.6 | 10.9 ± 0.2 | 8.9 ± 1.1  | 2.0 ± 1.1 | 7B |
| UPVK | 72.78829 N | 56.12800 W | 2007.4 | 2015.6 | 8.3 ± 0.1  | 5.8 ± 0.1  | 2.5 ± 0.1 | 7B |
| QAAR | 70.74041 N | 52.68837 W | 2007.7 | 2015.6 | 9.1 ± 0.2  | 5.3 ± 0.1  | 3.8 ± 0.2 | 7B |

**table S2. 1D viscosity profiles for Greenland.**

| Parameter              | Unit                   | Lower limit | Upper limit | Nominal | VM-GPS |
|------------------------|------------------------|-------------|-------------|---------|--------|
| Lithosphere thickness  | km                     | 50          | 100         | 80      | 60     |
| Upper mantle viscosity | x 10 <sup>20</sup> Pas | 2           | 5           | 4       | 5      |
| Lower mantle viscosity | x 10 <sup>22</sup> Pas | 0.5         | 2           | 1       | 2      |

**table S3. 1D viscosity profiles assigned to each region in Greenland.** Shading indicates the calibration regions (see text).

| Basin | Viscosity profile |                           |                            |
|-------|-------------------|---------------------------|----------------------------|
|       | LT (km)           | AV (10 <sup>20</sup> Pas) | UMV (10 <sup>20</sup> Pas) |
| 1     | 60                | 5                         | 5                          |
| 2     | 60                | 5                         | 5                          |
| 3A    | 50                | 4                         | 5                          |
| 3B    | 40                | 0.1                       | 5                          |
| 4     | 50                | 4                         | 5                          |
| 5     | 40                | 1                         | 5                          |
| 6     | 60                | 5                         | 5                          |
| 7A    | 90                | 11                        | 11                         |
| 7B    | 90                | 11                        | 11                         |
| Total | -                 | -                         | -                          |

**table S4. Uncertainty of the scaling parameter caused by the load and Earth model parameters.** The uncertainties represent relative uncertainties with respect to the unperturbed models.

| Rel. unc. (%) | VM-GPS (1D)      |                 |             |       | VM-GPS (3D)      |                 |             |       |
|---------------|------------------|-----------------|-------------|-------|------------------|-----------------|-------------|-------|
|               | $\Delta t_{end}$ | $\Delta h_{LT}$ | $\Delta AV$ | Total | $\Delta t_{end}$ | $\Delta h_{LT}$ | $\Delta AV$ | Total |
| 1             | 8.1              | 14.4            | 10.2        | 25.7  | 8.2              | 14.9            | 11.1        | 26.4  |
| 2             | 7.4              | 13.6            | 7.1         | 23.9  | 7.7              | 13.9            | 7.7         | 23.9  |
| 3A            | 5.3              | 13.5            | 4.6         | 23.2  | 6.8              | 15.8            | 14.0        | 28.5  |
| 3B            | 1.4              | 4.6             | 3.6         | 16.3  | 0.9              | 5.1             | 3.2         | 16.2  |
| 4             | 8.4              | 11.7            | 5.9         | 21.6  | 10.1             | 16.4            | 15.5        | 28.8  |
| 5             | 25.1             | 5.1             | 20.6        | 28.2  | 14.1             | 10.0            | 67.5        | 166.8 |
| 6             | 22.2             | 14.4            | 21.4        | 45.7  | 22.6             | 15.7            | 23.9        | 47.5  |
| 7A            | 7.0              | 12.1            | 10.5        | 23.6  | 3.6              | 3.0             | 3.2         | 17.2  |
| 7B            | 6.5              | 14.8            | 4.5         | 22.7  | 2.9              | 8.9             | 7.4         | 20.2  |

**table S5. Ratio of inferred scaling factor for the 3D viscosity profiles versus the 1D viscosity profile (VM-GPS). Shading indicates the calibration regions (same viscosity profile; see text).**

| Basin | Scale factor 3D/1D |
|-------|--------------------|
| 1     | 1.01               |
| 2     | 1.07               |
| 3A    | 1.04               |
| 3B    | 1.08               |
| 4     | 1.01               |
| 5     | -0.69              |
| 6     | 0.99               |
| 7A    | 1.18               |
| 7B    | 1.30               |

**table S6. SLE mass change per basin since LGM.**

| Site | GPS rate   | Elastic rate | GPS - elastic |
|------|------------|--------------|---------------|
| MIK2 | 15.4 ± 0.2 | 8.4          | 7.0           |
| KUAQ | 23.8 ± 0.3 | 22.6         | 1.2           |

**table S7. SLE mass change per basin during 1900–1983. Adopted from Kjeldsen et al, 2015 (14).**

| Basin | Green 1 SLE  |
|-------|--------------|
|       | mm           |
| 1     | 0.30 ± 0.65  |
| 2     | -0.65 ± 1.06 |
| 3A    | 0.21 ± 0.32  |
| 3B    | 2.91 ± 0.36  |
| 4     | 3.37 ± 0.58  |
| 5     | 1.84 ± 0.30  |
| 6     | 2.58 ± 1.61  |
| 7A    | 1.52 ± 0.32  |
| 7B*   | 5.23 ± 1.22  |
| Total | 17.29 ± 6.42 |
